# Supplementary material for: Junction-based lamellipodia drive endothelial cell rearrangements in vivo via a VE-cadherin-F-actin based oscillatory cell-cell interaction
Source: PubMed Central journal article supplement (PMC6119192; doi:10.1038/s41467-018-05851-9), 2018-08-31
Supplement: 41467_2018_5851_MOESM1_ESM.pdf [file 41467_2018_5851_MOESM1_ESM.pdf]

## **Supplementary Information**

Paatero et al. “Junction-based lamellipodia drive endothelial cell rearrangements in vivo via a VE-cadherin-F-actin based oscillatory cell-cell interactions”

**a**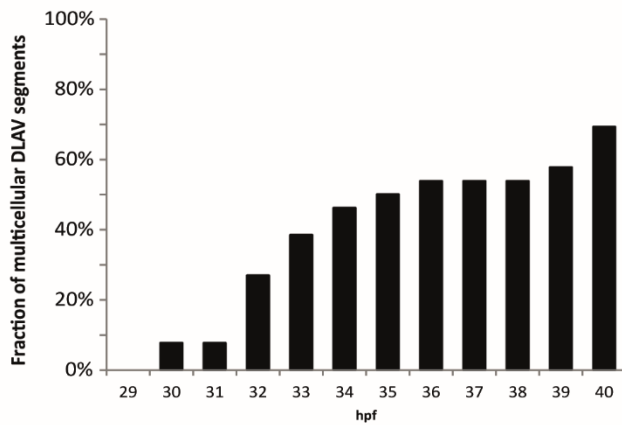**b**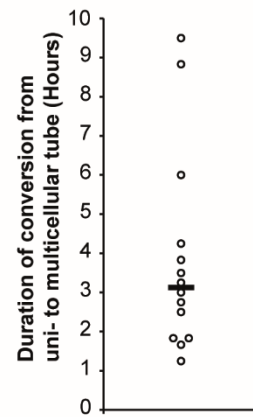**c**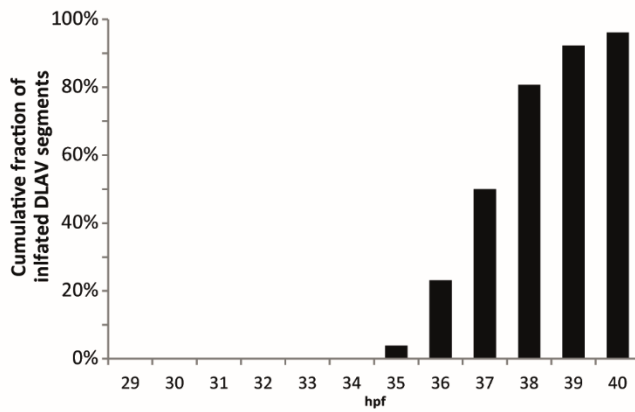

**Supplementary Figure 1.** Description of the transition of dorsal longitudinal anastomosing vessel (DLAV) from unicellular to multicellular architecture.

a) Quantification of the fraction of multicellular DLAV segments using Tg(BAC(*cdh5:cdh5-ts*)) embryos during development. n=26 DLAV segments (8 embryos). b) Quantification of the duration from anastomosis until final conversion into a multicellular tube. Black line is median. n=14 segments (8 embryos). c) Quantification of DLAV segments carrying blood flow during development. n=26 segments (8 embryos). hpf, hours post-fertilization.

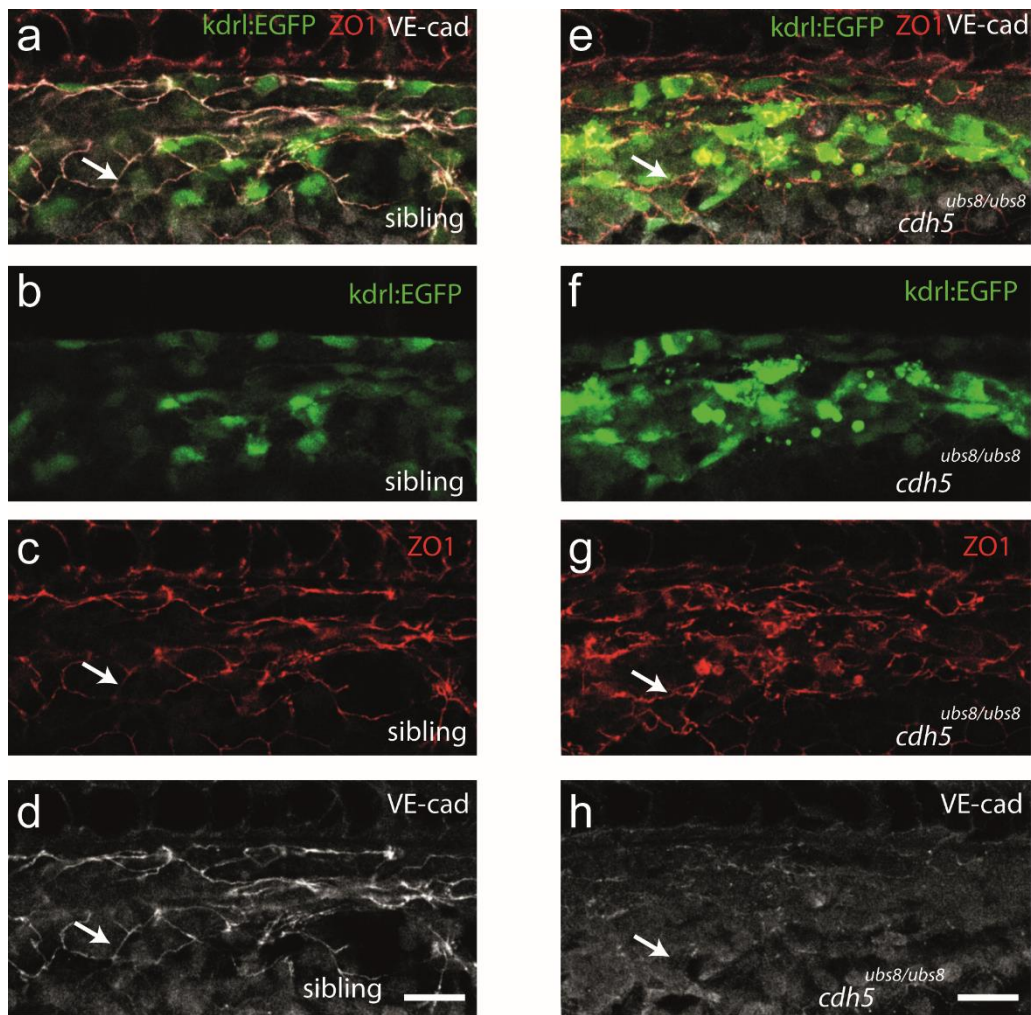

**Supplementary Figure 2.** Validation of the rat *Ve-cadherin* antibody in zebrafish embryo whole-mount immunofluorescence analysis.

a-h) Confocal images of a  $Tg(kdrl:EGFP^{s843})$  wild-type sibling (a-d) or a VE-cadherin null mutant embryo ( $Tg(kdrl:EGFP^{s843});cdh5^{ubs8/ubs8}$ ) (e-h), stained for VE-cadherin (rat anti-Cdh5) and ZO1. a and e shows the merged channels, b-d and e-h the individual channels. Arrow points to an endothelial cell-cell junction. Scale bar 20  $\mu m$ .

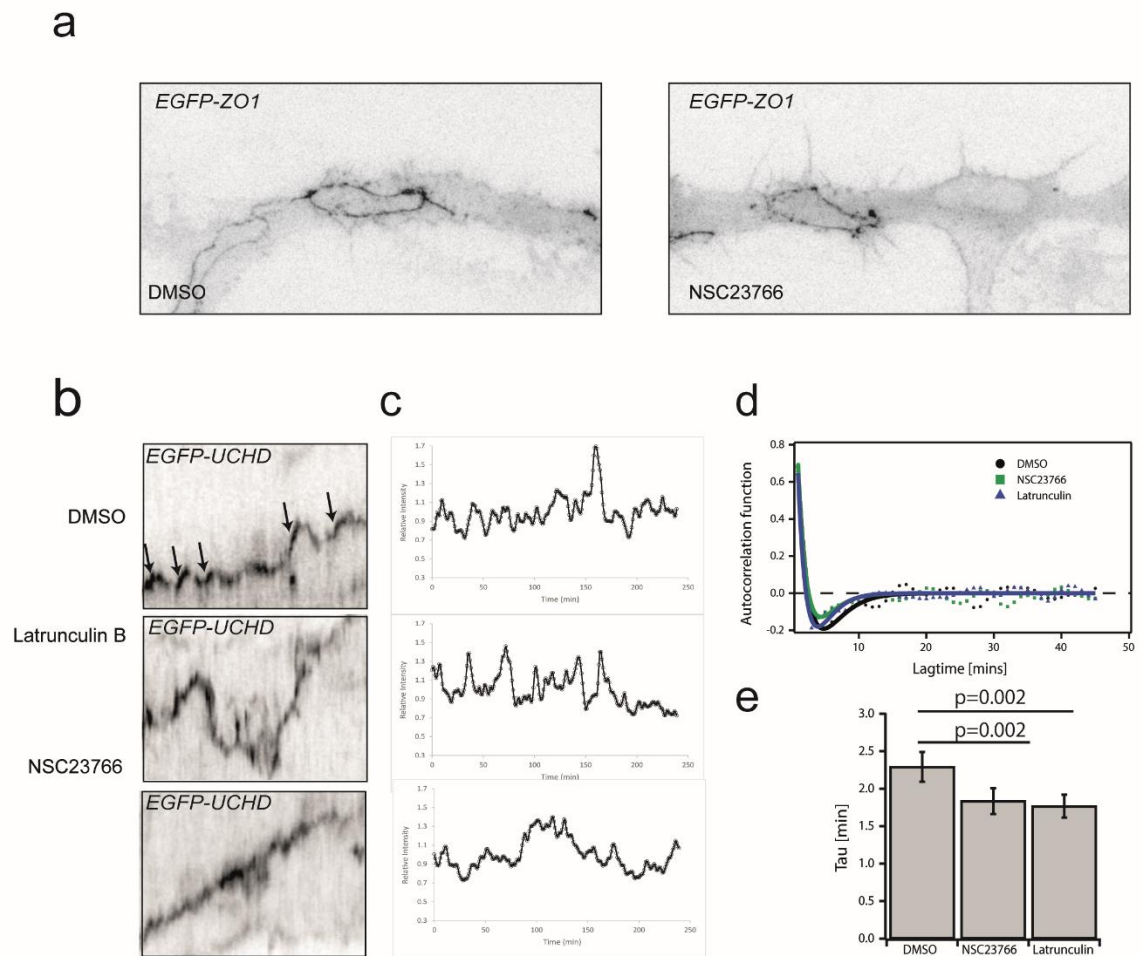

**Supplementary Figure 3.** Analysis of F-actin oscillations of the remodeling junctions.

a) Kymograph across the junction in dorsal aorta in EGFP-UCHD fish (data generated as in Fig. 3). Solid arrow denotes forward movement. b) Intensity plotting of EGFP-UCHD kymographs. c) Averaged autocorrelation functions of EGFP-UCHD intensity. DMSO, n=14 kymographs; Latrunculin B, n=16 kymographs; NSC23766, n=16 kymographs. d) Comparison of autocorrelation lifetime (tau parameter). Means and standard deviations are plotted. ANOVA and Dunnet's post-hoc test was used.

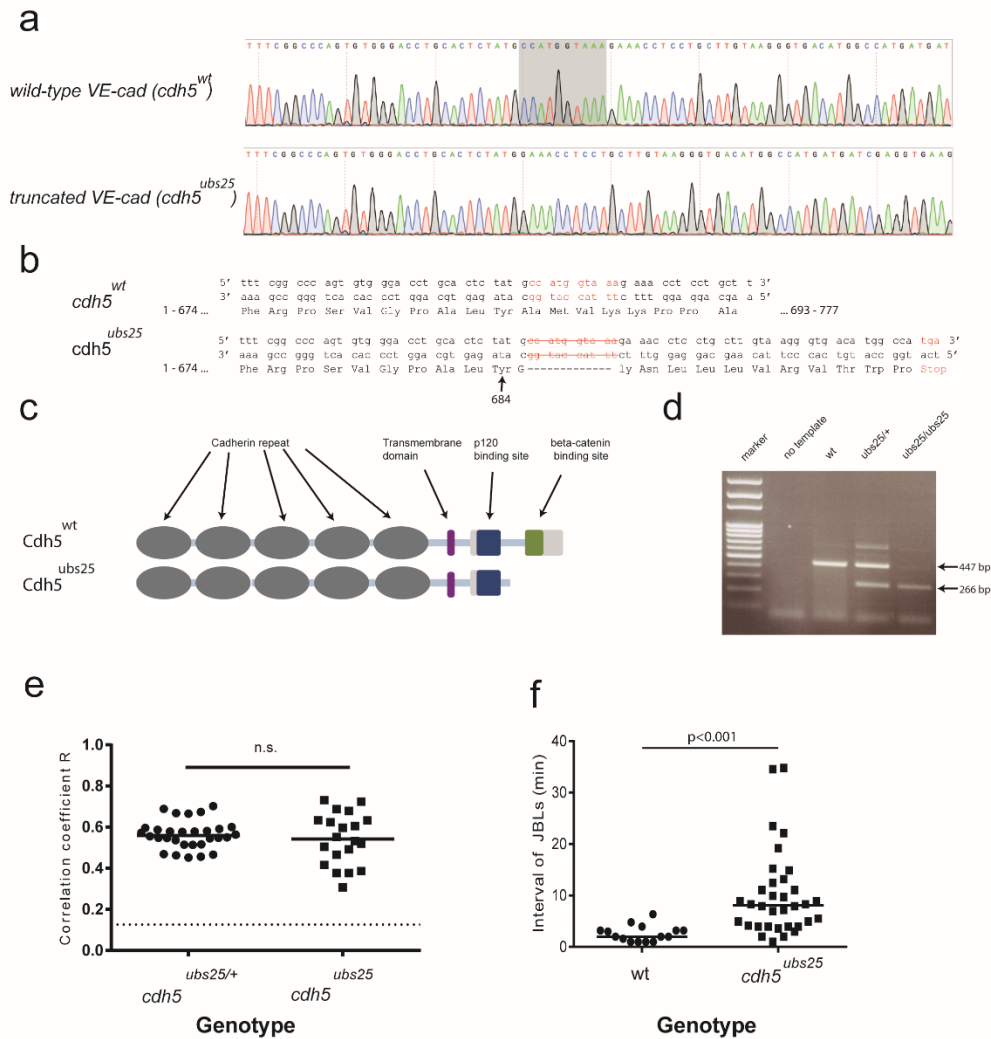

**Supplementary Figure 4. Generation and validation of VE-cad truncation mutant allele.**

a) Sequencing chromatogram of wild-type *ve-cadherin* (encoded by *cdh5* gene) sequence (exon 12) and respective truncation mutant *cdh5*<sup>ubs25</sup> sequence. b) The wild-type and mutant DNA sequences and their respective translations. The *cdh5*<sup>ubs25</sup> mutation leads to a premature stop. c) Schematic illustration of the domains in both full-length wild-type VE-cad and in truncated VE-cad (*Cdh5*<sup>ubs25</sup>). d) Example of genotyping PCR and different *cdh5*<sup>ubs25</sup> allelic combinations. e) Plot showing colocalization of ZO1 and truncated *Cdh5* at endothelial cell junctions. Pearson correlation coefficients of colocalization analysis of anti-VEC and anti-ZO1 in heterozygote (*cdh5*<sup>ubs25/+</sup>) and homozygote (*cdh5*<sup>ubs25/ubs25</sup>) VE-cad mutants. *cdh5*<sup>ubs25/+</sup>, n=30 cell-cell junctions (2 embryos); *cdh5*<sup>ubs25/ubs25</sup>, n=20 cell-cell junctions (1 embryo). n.s., non-significant (p=0.75, non-parametric Mann-Whitney test). f) Quantitation of the interval of subsequently occurring JBLs based on EGFP-UCHD signal. Time from end of the first JBL to emergence of new JBL in the same spot was measured; wild-type n=15 (2 embryos) and *cdh5*<sup>ubs25/ubs25</sup> n=36 (4 embryos). All embryos carried EGFP-UCHD transgene *Tg(fli:GFF ; UAS:EGFP-UCHD)*. Non-parametric Mann-Whitney statistical test was used.

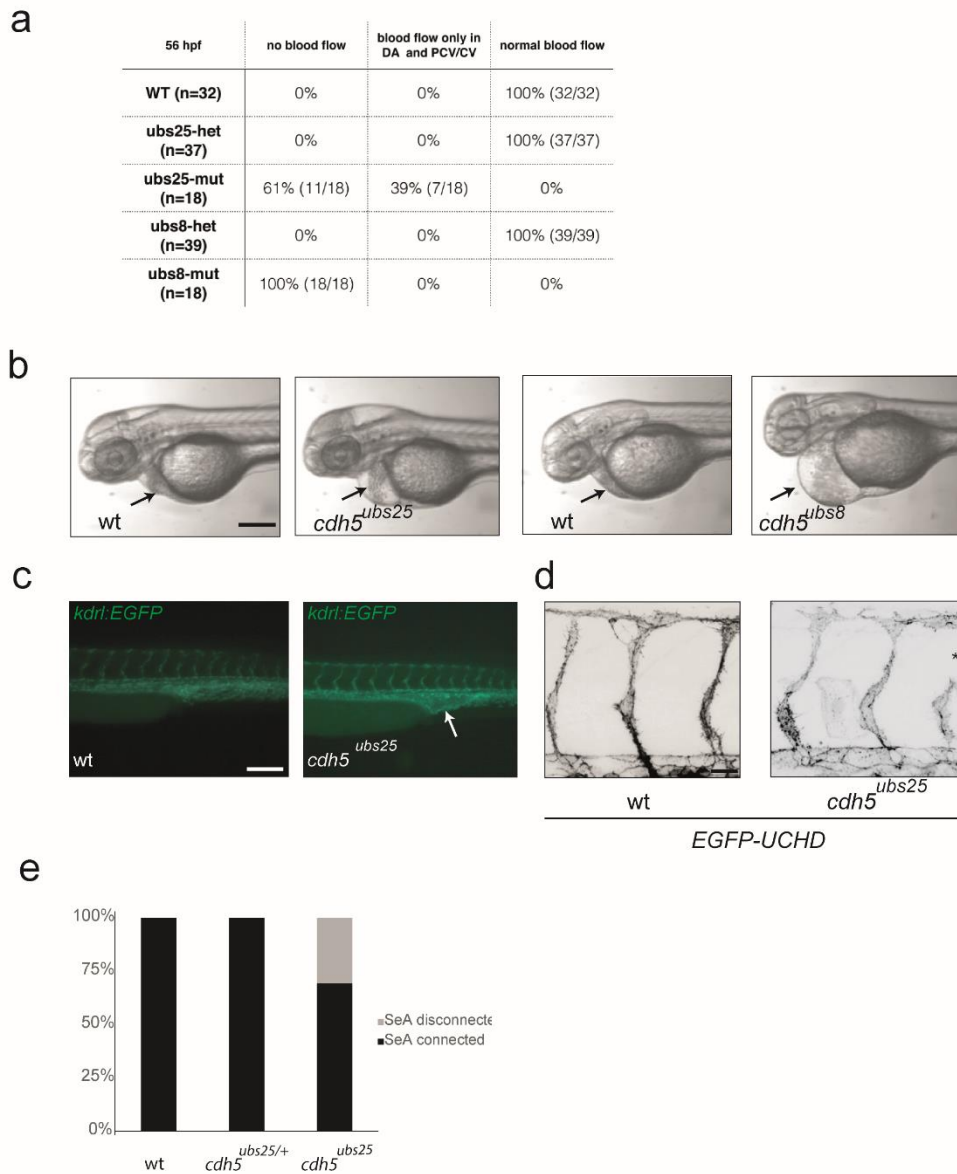

**Supplementary Figure 5. Phenotypic analysis of the *ve-cad* truncation mutant zebrafish.**

a) Table of blood flow phenotype of 56hpf VE-cadherin null mutant (*cdh5*<sup>*ubs8*/*ubs8*</sup>) and the truncation mutant (*cdh5*<sup>*ubs25*/*ubs25*</sup>) embryos. b) Stereomicroscope images of the embryos. Arrows point to pericardiac area, pronounced oedema is observed in mutant embryos. Scale bar, 400μm. c) Fluorescence images of Tg(*kdrl*:EGFP<sup>843</sup>) embryos at 48hpf. Arrow points of enlarged cardinal vein in *cdh5*<sup>*ubs25*</sup> homozygote embryo. Scale bar, 200 μm. d) Confocal images illustrating the tip cell /stalk cell disconnection (arrow) in the *cdh5*<sup>*ubs25*</sup> homozygote embryo. In normal SeA the connection between tip cell and stalk cell is intact. Scale bar, 20 μm. e) Quantification of tip cell stalk cell disconnection; *cdh5*<sup>*ubs25*/+</sup>, n=7 SeA; *cdh5*<sup>*ubs25*/*ubs25*</sup>, n=36 SeA; wild-type n=22 SeA.
